# Supplementary material for: A novel route for the generation of Co/CoZn/CoNi layered double hydroxides at ambient temperature
Source: Royal Society of Chemistry journal article supplement (doi:10.1039/c9qi00340a), 2019-01-01
Supplement: c9qi00340a1.pdf [file c9qi00340a1.pdf]

## Electronic Supplementary Information

A novel route for generation of Co/CoZn/CoNi layered double hydroxides at ambient temperature

*Liyong Chen,\* Huifang Wang, Xiaoshuang Shen, Yingyue Zhang, Dezhi Li, and Chunying Duan\**

## Experimental Section

### Material characterization and synthesis method

All chemical reagents, including cobalt nitrate ( $\text{Co}(\text{NO}_3)_2 \cdot 6\text{H}_2\text{O}$ ), zinc nitrate ( $\text{Zn}(\text{NO}_3)_2 \cdot 6\text{H}_2\text{O}$ ), 2-methylimidazole (Hmim), and methanol, were purchased from Sinopharm Chemical Reagent Co., Ltd, China and were directly used as received.

The structural and morphological investigation was performed on a Tecnai F30 transmission electron microscope operated at 300 kV and a HITACHI UHR FE-SEM SU8220 scanning electron microscope. The phase of materials was characterized in a Rigaku D/Max 2400 automatic powder X-ray diffractometer with  $\text{Cu-K}\alpha$  radiation ( $\lambda = 1.5418 \text{ \AA}$ ). The measurement of thickness of sheets was carried out on a Park System XE-70 atomic force microscope with non-contact mode. Brunauer-Emmett-Teller (BET) surface area analysis and porosity measurement in the relative pressure range  $P/P_0 = 0-1.0$  were performed at 77 K on an automated adsorption analyzer (Autosorb iQ, Quantachrome Corp., US). Raman spectra were collected on by Jobin Yvon LabRAM HR Evolution Raman Spectrometer. X-ray photoelectron spectroscopy (XPS) was performed on Thermo ESCALAB 250Xi with  $\text{Al-K}\alpha$  radiation ( $h\nu = 1486.6 \text{ eV}$ ). Electrocatalytic studies were conducted with a CHI760E electrochemical workstation. Electrochemical impedance spectroscopy (EIS) was measured in a ZAHNER ENNIUM electrochemical workstation.

*Preparation of ZIF-67 rhombic dodecahedra (RDs).* In a typical synthetic procedure,  $\text{Co}(\text{NO}_3)_2 \cdot 6\text{H}_2\text{O}$  (0.4 mmol, 116.4 mg) and Hmim (0.8 mmol, 65.7 mg) were dissolved into methanol (5 mL), respectively. The methanolic solution of Hmim was slowly poured into the methanolic solution of  $\text{Co}(\text{NO}_3)_2$  with vigorously stirring prior to being kept at 25 °C for 24 h without turbulence. The dark violet powder was collected by centrifugation and rinsed twice by methanol. The final product was dried in vacuum at 80 °C for 12 h.

*Preparation of Co-LDHs.*  $\text{Co}(\text{NO}_3)_2 \cdot 6\text{H}_2\text{O}$  (6 mmol, 1746.2 mg) and Hmim (12 mmol, 985.2 mg) were dissolved into methanol (5 mL), respectively. The methanolic solution of Hmim was slowly poured into the methanolic solution of  $\text{Co}(\text{NO}_3)_2$  with vigorously stirring prior to being kept at 25 °C for 24 h without turbulence. The yellowish brown powder was collected by centrifugation and rinsed twice by methanol. The final product was dried in vacuum at 80 °C for 12 h.

*Preparation of hybrids of ZIF-67/Co-LDHs.*  $\text{Co}(\text{NO}_3)_2 \cdot 6\text{H}_2\text{O}$  (4 mmol, 1164.2 mg) and Hmim (8 mmol, 656.8 mg) were dissolved into methanol (5 mL), respectively. The methanolic solution of Hmim was slowly poured into the methanolic solution of  $\text{Co}(\text{NO}_3)_2$  with vigorously stirring prior to being kept at 25 °C for 24 h without turbulence. The dark violet powder was collected by centrifugation and rinsed twice by methanol. The final product was dried in vacuum at 80 °C for 12 h.

To further understand the effect of concentration and molar ratio on material phase, the concentrations of  $\text{Co}(\text{NO}_3)_2$  and Hmim in methanol were adjusted with the same molar ratio of 1:2 from  $\text{Co}(\text{NO}_3)_2$  to Hmim; the molar ratio from  $\text{Co}(\text{NO}_3)_2$  to Hmim was adjusted with the fixed amount of  $\text{Co}(\text{NO}_3)_2$ , such as 0.4 and 4 mmol. The synthetic conditions were summarized in Table S1.

*Transformation of ZIF-67 to Co-LDHs.* The as-made ZIF-67 RDs (50 mg) and  $\text{Co}(\text{NO}_3)_2 \cdot 6\text{H}_2\text{O}$  (4 mmol, 328.4 mg) were dispersed into methanol (10 mL) to obtain uniform suspension after sonication for 5 min. The resulting mixture was kept at 25 °C for 4 d without turbulence. The yellowish brown powder was collected by centrifugation and rinsed twice by methanol. The final product was dried in vacuum at 80 °C for 12 h.

*Transformation of Co-LDHs to ZIF-67.* Similarly, the sheets-assembled Co-LDHs (50 mg) and Hmim (4 mmol, 1164.2 mg) were dispersed into methanol (10 mL) to obtain uniform suspension after sonication for 5 min. The resulting mixture was transferred into a Teflon-lined stainless steel autoclave (20 mL) and kept at 80 °C for 4 h. The dark violet powder was collected by centrifugation and rinsed twice by methanol. The final product was dried in vacuum at 80 °C for 12 h.

*Preparation of hetero-bimetallic CoZn- and CoNi-ZIFs.*  $\text{Co}(\text{NO}_3)_2 \cdot 6\text{H}_2\text{O}$  (3.5 mmol, 1018.6 mg) and  $\text{Zn}(\text{NO}_3)_2 \cdot 6\text{H}_2\text{O}$  (0.5 mmol, 148.7 mg) were dispersed into methanol (5 mL), and a solution containing Hmim (12 mmol, 985.2 mg) and methanol (5 mL) were slowly added with vigorously stirring prior to being kept at 25 °C for 24 h without turbulence. The dark violet powder was collected by centrifugation and rinsed twice by methanol. The final product was dried in vacuum at 80 °C for 12 h.

To prepare CoNi-ZIFs,  $\text{Co}(\text{NO}_3)_2 \cdot 6\text{H}_2\text{O}$  (3.9 mmol, 1135 mg) and  $\text{Ni}(\text{NO}_3)_2 \cdot 6\text{H}_2\text{O}$  (0.1 mmol, 29.1 mg) were used in the synthetic process under the otherwise identical conditions.

*Preparation of sheets-assembled CoZn- and CoNi-LDHs.*  $\text{Co}(\text{NO}_3)_2 \cdot 6\text{H}_2\text{O}$  (3.5 mmol, 1018.6 mg) and  $\text{Zn}(\text{NO}_3)_2 \cdot 6\text{H}_2\text{O}$  (0.5 mmol, 148.7 mg) were dispersed into methanol (5 mL), and a solution containing Hmim (1 mmol, 82.1 mg) and methanol (5 mL) were slowly added with vigorously stirring prior to being kept at 25 °C for 24 h without turbulence. The pale pink powder was collected by centrifugation and rinsed twice by methanol. The final product was dried in vacuum at 80 °C for 12 h.

To prepare CoNi-LDHs,  $\text{Co}(\text{NO}_3)_2 \cdot 6\text{H}_2\text{O}$  (3.9 mmol, 1135 mg) and  $\text{Ni}(\text{NO}_3)_2 \cdot 6\text{H}_2\text{O}$  (0.1 mmol, 29.1 mg) were used in the synthetic process under the otherwise identical conditions.

## **Electrochemical Measurements**

*Preparation of Catalyst Ink:* The mixture containing 2 mg of electrocatalysts (Co-LDHs-(0.6:1.2)-25 and CoNi-LDHs), 980  $\mu\text{L}$  of ethanol, and 20  $\mu\text{L}$  of Nafion solution (5 wt%) was sonicated for 20 min to form a well-dispersed suspension.

*Preparation of working Electrode:* Glassy carbon (GC) electrodes (3 mm in diameter) were polished by using alumina suspension on a Nylon plate, rinsed with deionized water and dried at room temperature in air. The catalyst ink (5  $\mu\text{L}$ ) was drop-casted on the polished GC electrode, and dried naturally.

In addition, Ag/AgCl (3.5 M KCl) and polished Pt wire were used as the reference electrode and the counter electrode, respectively.

*Electrochemical Measurement:* Linear-sweep voltammetry (LSV) were performed at a sweep rate of 5  $\text{mV s}^{-1}$  at a potential window of 0 to 0.8 V vs Ag/AgCl after scanning

cyclic voltammetry (CV) between 0 V and 0.6 V for five times. To estimate the double-layer capacitance of Co- and CoNi-LDHs, CV curves were carried out at variable sweep rates of 10, 20, 30, 40, and 50 mV s<sup>-1</sup> in the range from 0.207 to 0.307 V *vs* Ag/AgCl. EIS was measured at overpotential of 300 mV in the frequency range of 0.1 Hz to 100 kHz with oscillation potential amplitudes of 5 mV. All electrochemical measurements were conducted in 1 M KOH solution.

The measured potential *vs* Ag/AgCl can be converted the potential *vs* reversible hydrogen electrode (RHE) by using the Nernst equation of  $E_{\text{RHE}} = E_{\text{Ag/AgCl}} + 0.0591\text{pH} + 0.197$ .

**Table S1. Preparation of ZIF-67, Co-LDHs and their hybrids under different conditions.**

| entry | Amount (mmol)                     |      | Molar ratio            | Reaction condition |                     |              |
|-------|-----------------------------------|------|------------------------|--------------------|---------------------|--------------|
|       | Co(NO <sub>3</sub> ) <sub>2</sub> | Hmim | Co <sup>2+</sup> /Hmim | Temperature        | solvent             | Time/h       |
| 1a    | 0.4                               | 0.8  | 1:2                    | 25 °C              | Methanol<br>(10 mL) | 24           |
| 1b    | 2                                 | 4    | 1:2                    |                    |                     | 24           |
| 1c    | 3                                 | 6    | 1:2                    |                    |                     | 24           |
| 1d    | 4                                 | 8    | 1:2                    |                    |                     | 1min/1/24/72 |
| 1e    | 5                                 | 10   | 1:2                    |                    |                     | 24           |
| 1f    | 6                                 | 12   | 1:2                    |                    |                     | 24           |
| 1g    | 8                                 | 16   | 1:2                    |                    |                     | 24           |
| 1h    | 0.4                               | 1.2  | 1:3                    |                    |                     | 24           |
| 1i    | 0.4                               | 0.4  | 1:1                    |                    |                     | 2/24         |
| 1j    | 0.4                               | 0.2  | 2:1                    |                    |                     | 24           |
| 1k    | 4                                 | 16   | 1:4                    |                    |                     | 24           |
| 1l    | 4                                 | 12   | 1:3                    |                    |                     | 24           |
| 1m    | 4                                 | 4    | 1:1                    |                    |                     | 24           |
| 1n    | 4                                 | 2    | 2:1                    |                    |                     | 24           |
| 2a    | 0.2                               | 0.4  | 1:2                    | 80 °C              |                     | 4            |
| 2b    | 0.4                               | 0.8  | 1:2                    |                    |                     | 4            |
| 2c    | 2                                 | 4    | 1:2                    |                    |                     | 4            |
| 2d    | 3                                 | 6    | 1:2                    |                    |                     | 4            |
| 2e    | 4                                 | 8    | 1:2                    |                    |                     | 4            |
| 2f    | 6                                 | 12   | 1:2                    |                    |                     | 4            |
| 2g    | 0.4                               | 1.2  | 1:3                    |                    |                     | 4            |
| 2h    | 0.4                               | 0.4  | 1:1                    |                    |                     | 4            |
| 2i    | 4                                 | 16   | 1:4                    |                    |                     | 4            |
| 2j    | 4                                 | 12   | 1:3                    |                    |                     | 4            |
| 2k    | 4                                 | 4    | 1:1                    |                    |                     | 4            |

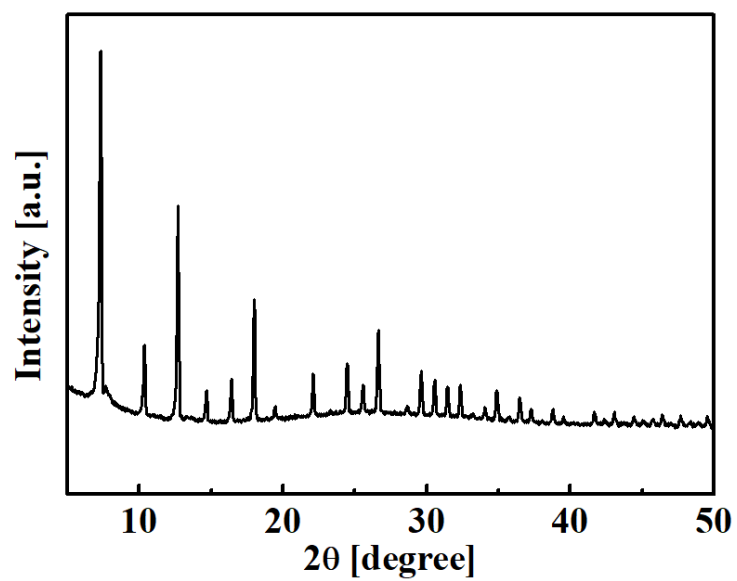

**Figure S1.** XRD pattern of ZIF-67 RDs prepared by a typical procedure shown as follows: a methanolic solution containing 0.04 M  $\text{Co}(\text{NO}_3)_2$  and 0.08 M Hmim at 25 °C within 24 h.

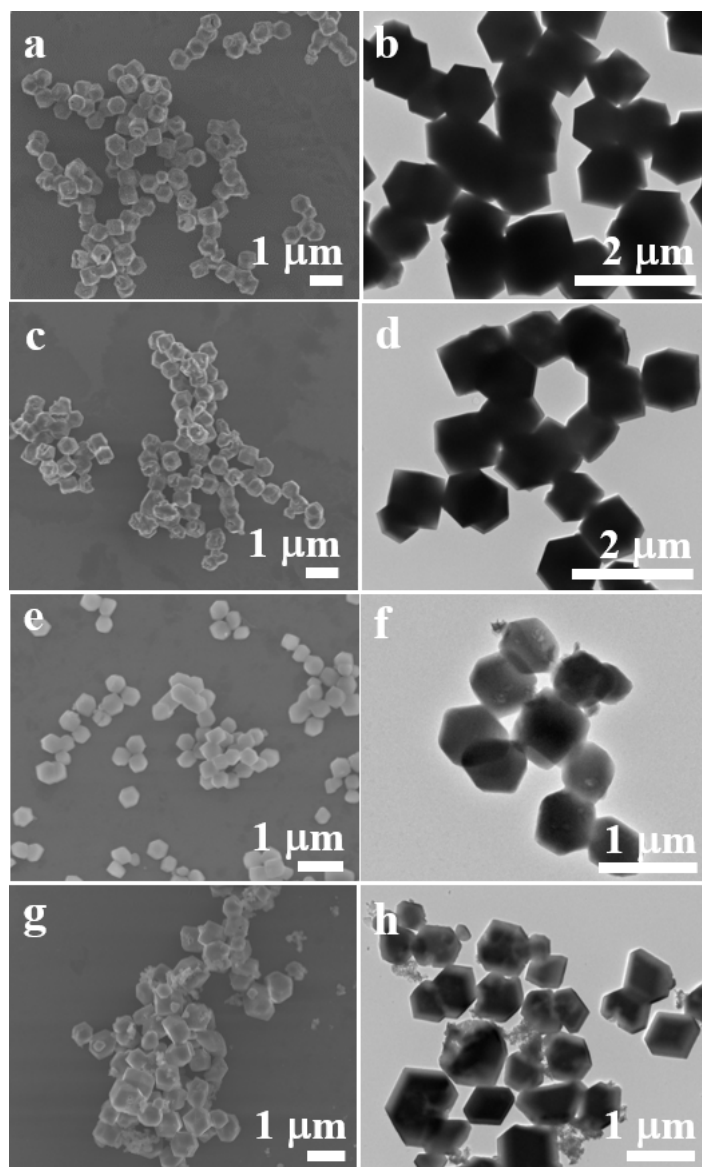

**Figure S2.** Panoramic SEM (left) and TEM (right) images of samples prepared with different concentrations of  $\text{Co}^{2+}$  and Hmim at 25 °C: (a,b) 0.04 and 0.08 M, (c,d) 0.2 and 0.4 M, (e,f) 0.3 and 0.6 M, (g,h) 0.4 and 0.8 M.

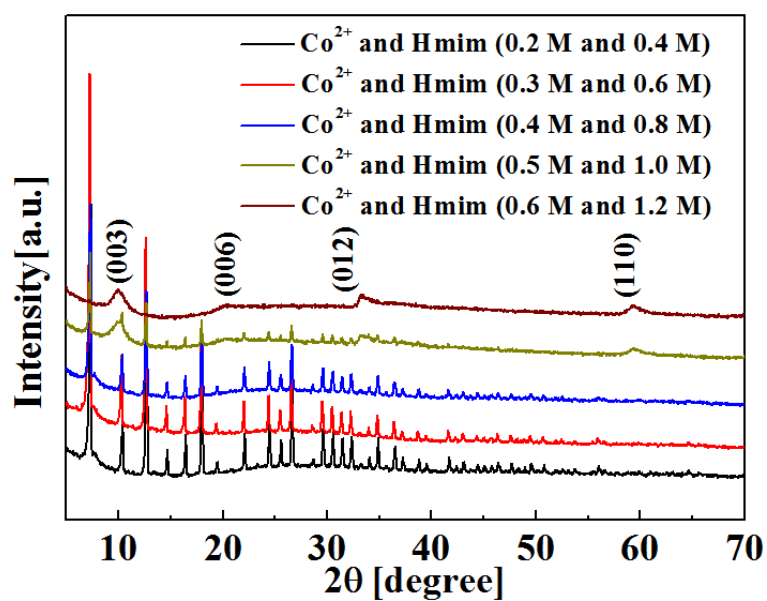

**Figure S3.** XRD patterns of samples prepared at different concentrations of  $\text{Co}^{2+}$  and Hmim with their molar ratio of 1:2.

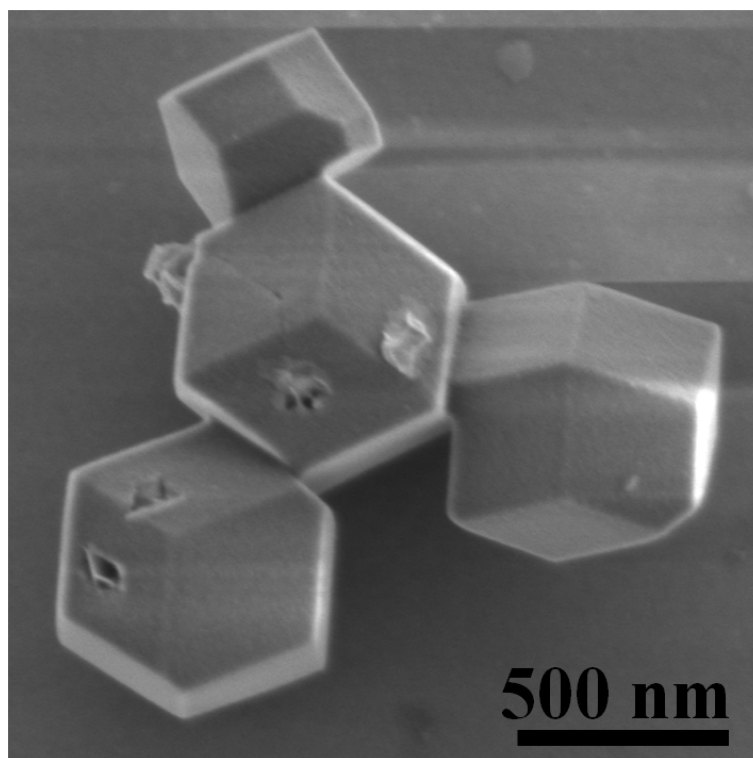

**Figure S4.** The magnified SEM image of ZIF-67/Co-LDHs-(0.3:0.6) hybrids shown in Figure 2f.

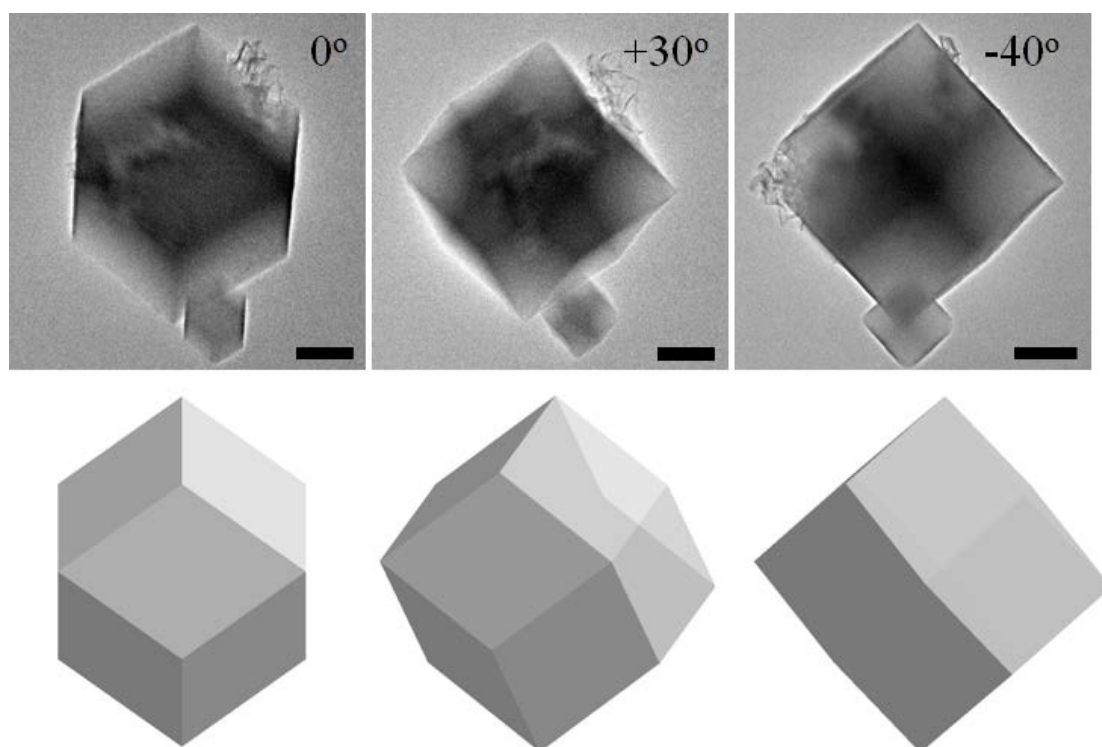

**Figure S5.** TEM images of ZIF-67/Co-LDHs-(0.3:0.6) hybrids observed from different directions (top); corresponding to schematic illustrations of rhombic dodecahedron (bottom).

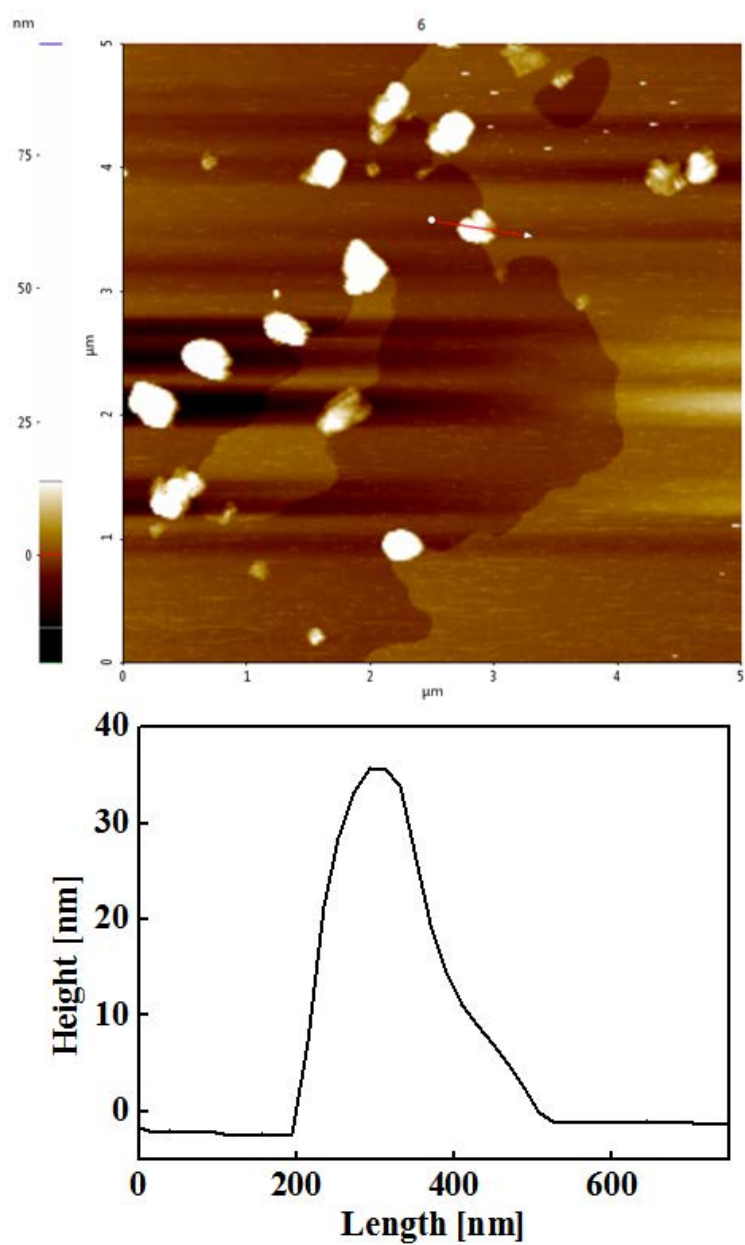

**Figure S6.** AFM image of Co-LDHs-(0.6:1.2) (top); the thickness of a sheet labeled in the AFM image (bottom).

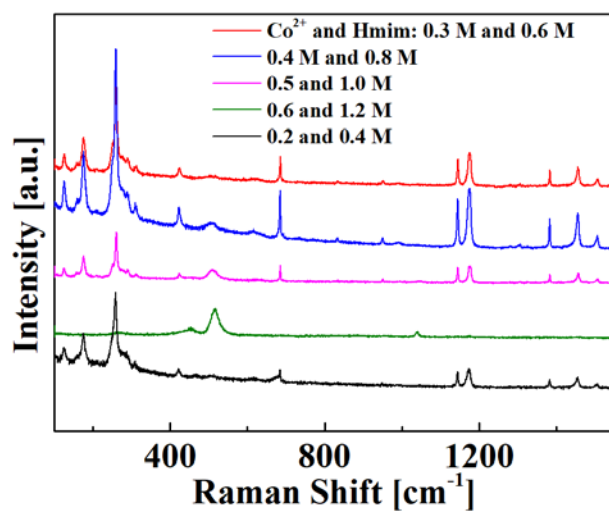

**Figure S7.** Raman spectra of samples prepared from different concentrations of  $\text{Co}^{2+}$  and Hmim at 25 °C.

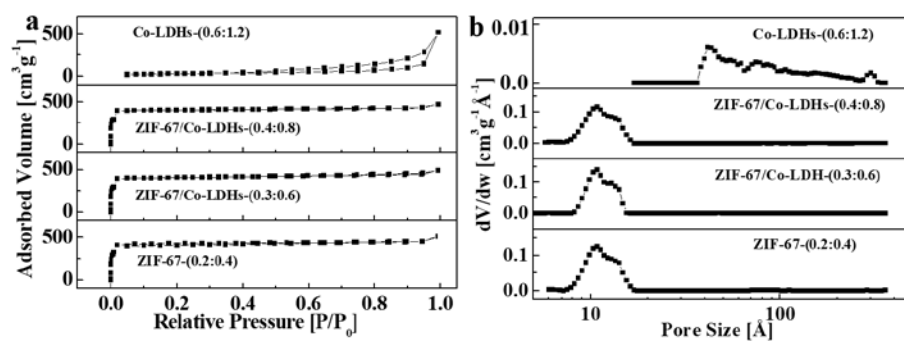

**Figure S8.** (a) N<sub>2</sub> sorption isotherms at 77 K for samples prepared at different concentrations of Co<sup>2+</sup> and Hmim at 25 °C; (b) corresponding pore size distribution curves

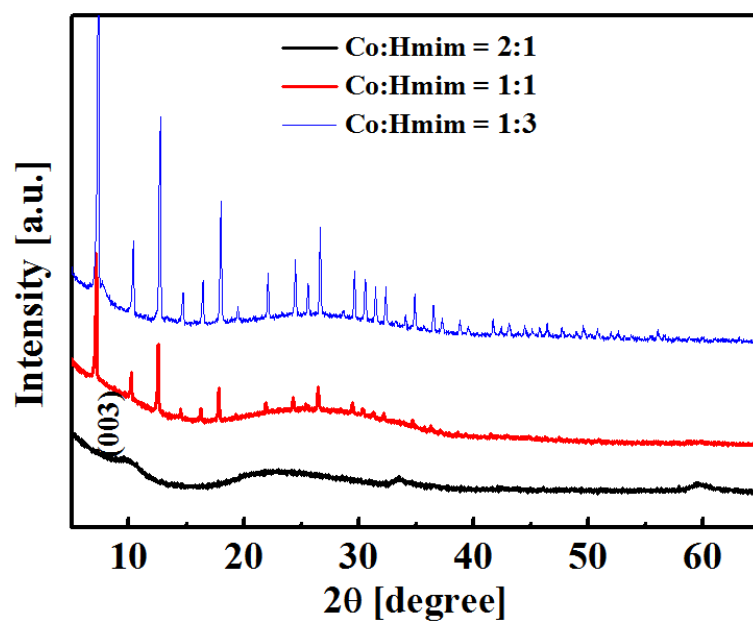

**Figure S9.** XRD patterns of samples prepared at different molar ratios of Co<sup>2+</sup> to Hmim with a constant concentration of 0.04 M Co<sup>2+</sup>.

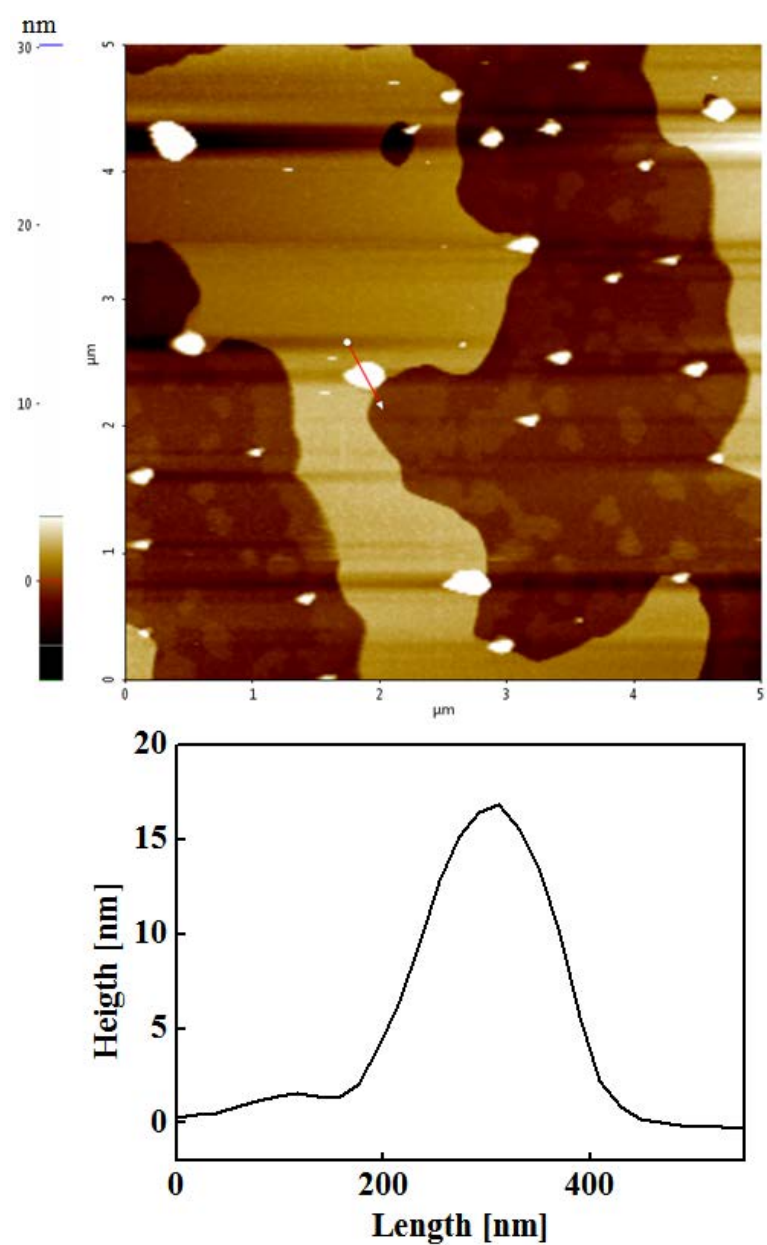

**Figure S10.** AFM image of Co-LDHs-(0.04:0.02) (top); the thickness of a sheet labeled in the AFM image (bottom).

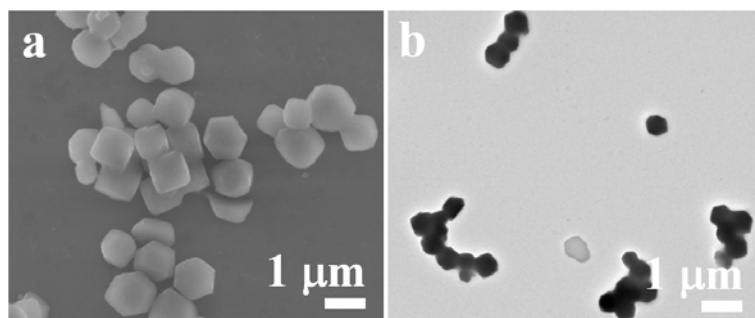

**Figure S11.** Panoramic SEM (a) and TEM (b) images of samples prepared at  $\text{Co}^{2+}/\text{Hmim}$  molar ratio of 1:3.

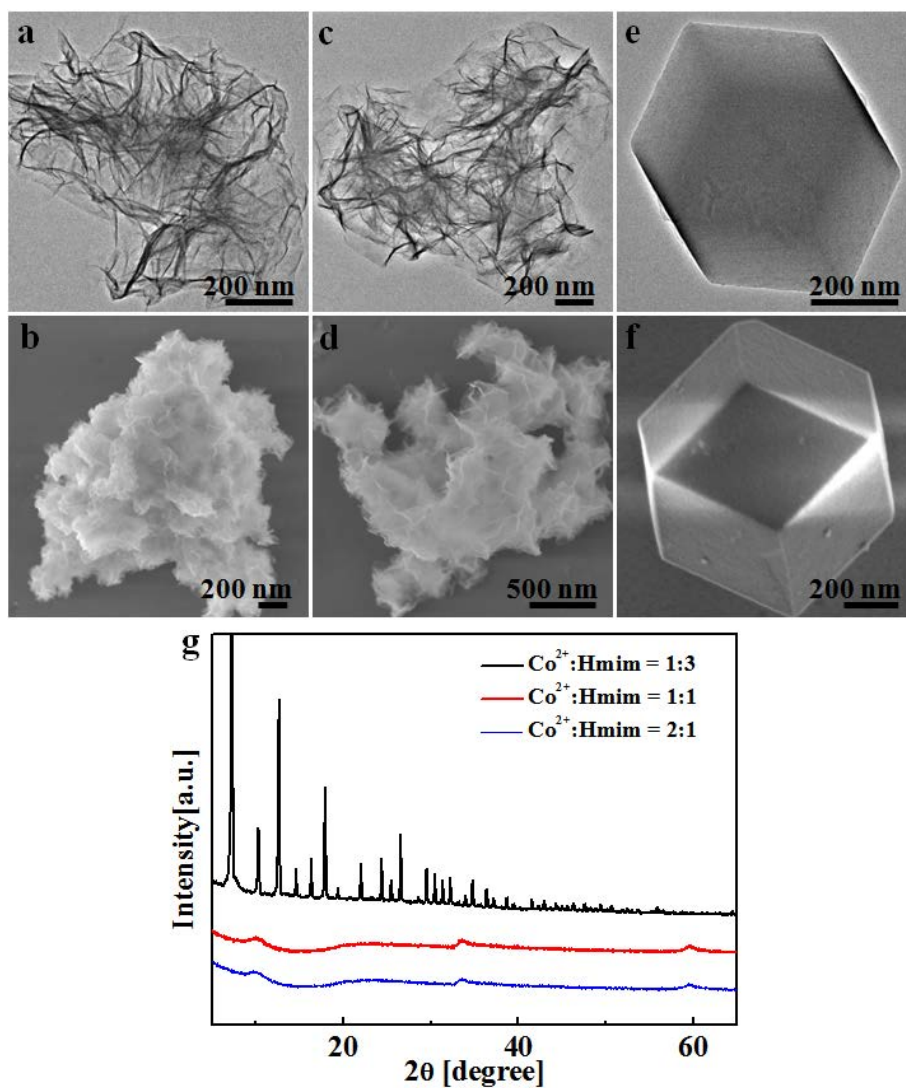

**Figure S12.** TEM (top) and SEM (middle) images of samples prepared at different molar ratios from  $\text{Co}^{2+}$  to Hmim with a constant concentration of  $0.4 \text{ M Co}^{2+}$ : (a, b)  $2:1$ , (c, d)  $1:1$ , and (e, f)  $1:3$ . (g) XRD patterns of these samples.

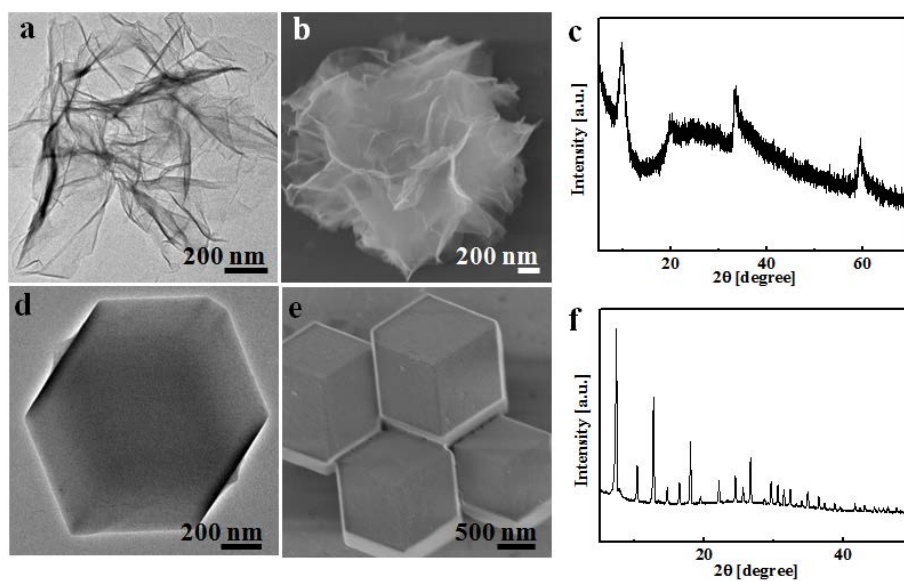

**Figure S13.** Co-LDHs prepared in methanolic solution of 0.8 M  $\text{Co}^{2+}$  and 1.6 M Hmim (top) and ZIF-67 obtained in methanolic solution of 0.4 M  $\text{Co}^{2+}$  and 1.6 M Hmim (bottom) at 25 °C: (a, d) TEM and (b, e) SEM images and (c, f) XRD patterns.

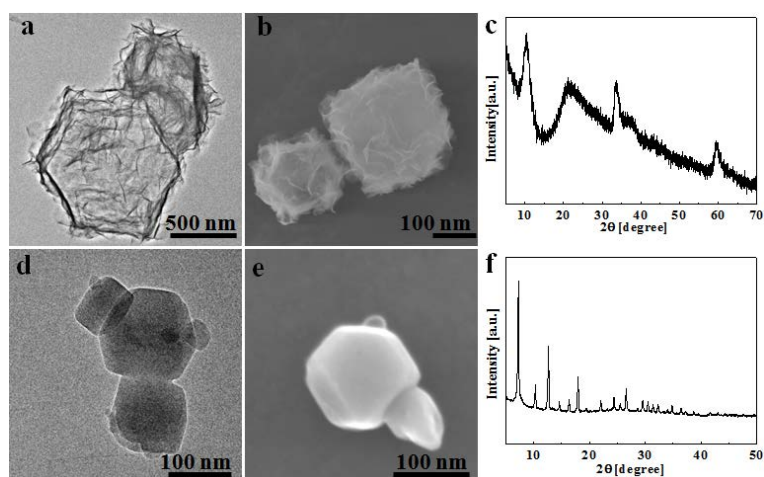

**Figure S14.** TEM and SEM images and XRD patterns of (a, b, c) cage-like Co-LDHs assembled with sheets by transformation of ZIF-67 RDs at 25 °C after adding  $\text{Co}^{2+}$  ions and (d, e, f) ZIF-67 nanocrystals by transformation of Co-LDHs sheets at 80 °C after adding Hmim.

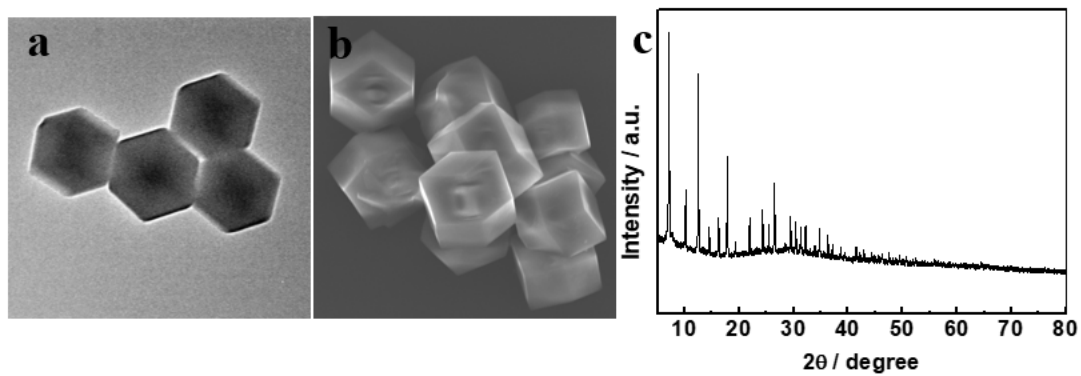

**Figure S15.** (a) TEM and (b) SEM images and (c) XRD pattern of ZIF-67 nanocrystals at 25 °C for 24 h while adding 0.8 mmol Hmim to the used solvent of methanol (5 mL).

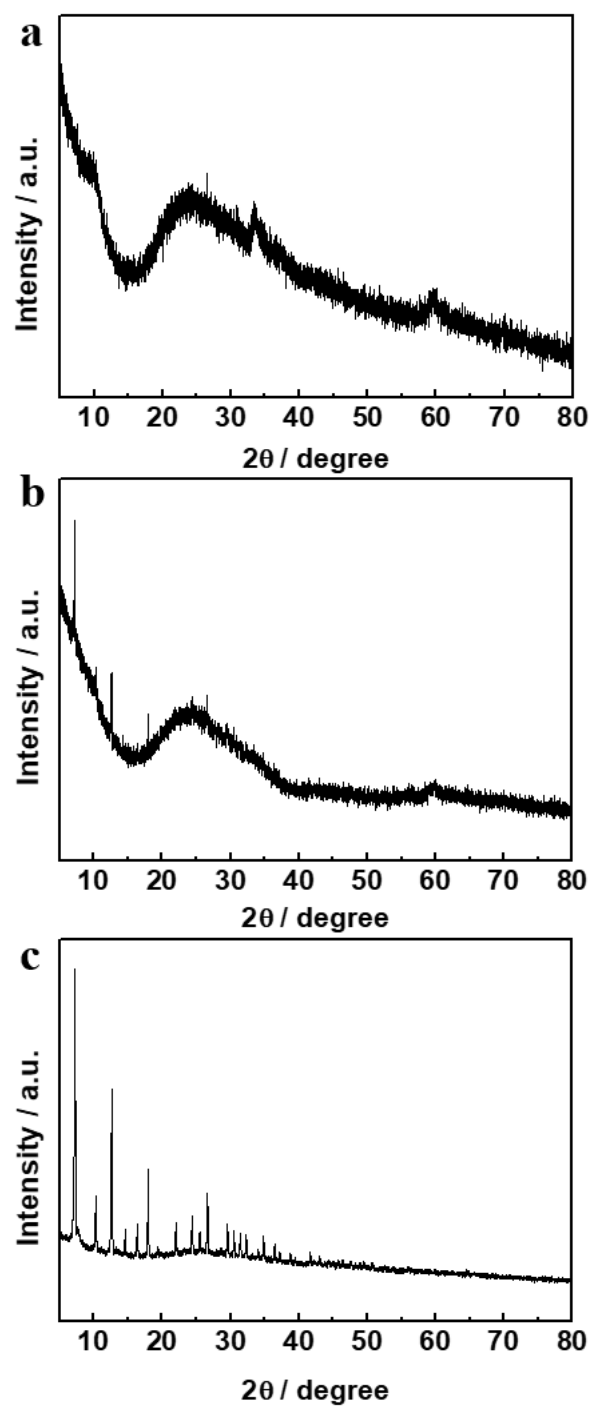

**Figure S16.** XRD patterns of samples prepared in the used solvent of methanol at different ratios of  $\text{Co}^{2+}$  to Hmim with a constant concentration of 0.04 M  $\text{Co}^{2+}$  at 25 °C: (a) 2:1, (b) 1:1, and (c) 1:3.

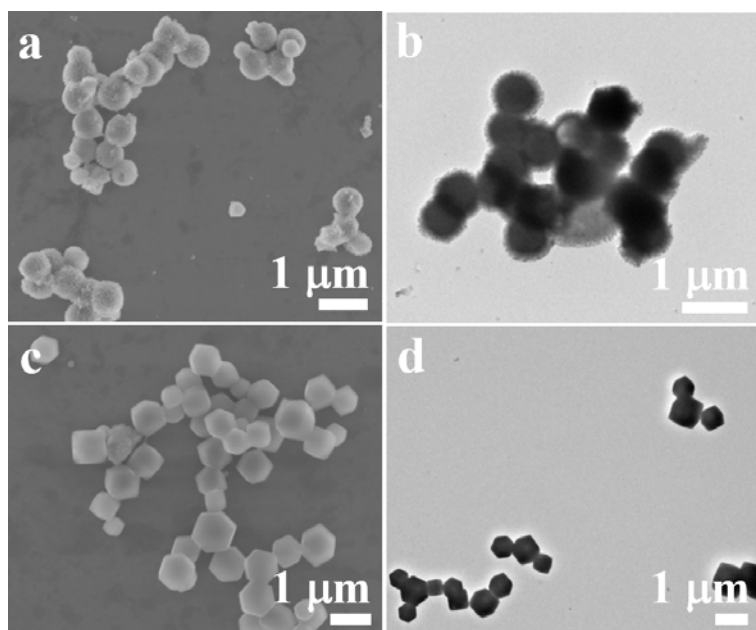

**Figure 17.** Panoramic SEM (left) and TEM (right) images of samples prepared in the used solvent of methanol at different ratios of  $\text{Co}^{2+}$  to Hmim with a constant concentration of 0.04 M  $\text{Co}^{2+}$  at 25 °C: (a, b) 1:1 and (c, d) 1:3.

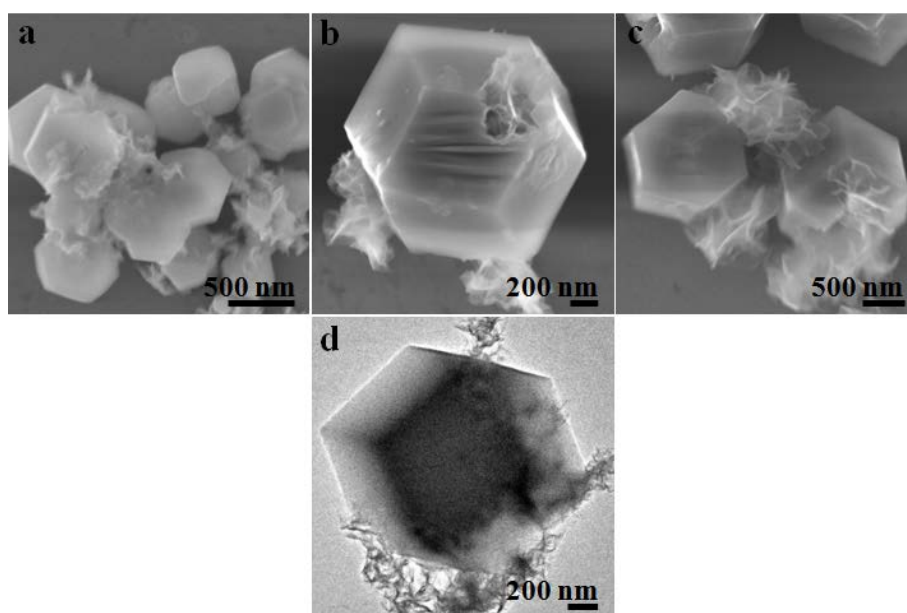

**Figure S18.** SEM images of intermediates prepared within (a) 1 min, (b) 1 h, and (c) 72 h at room temperature; (d) TEM image of the intermediate prepared within 1 h. The synthetic system is the methanolic solution of  $\text{Co}^{2+}$  (0.4 M) and Hmim (0.8 M).

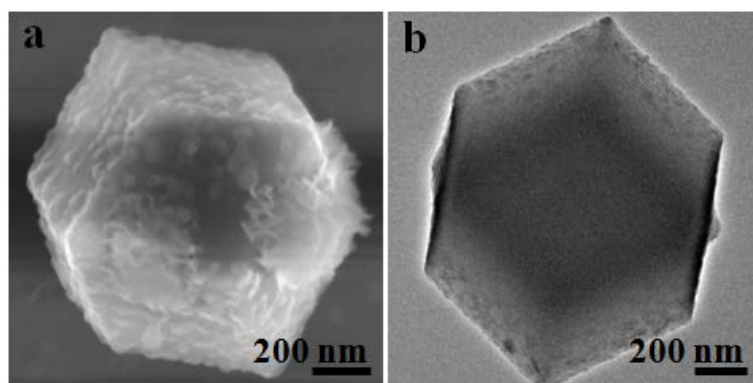

**Figure S19.** (a) SEM and (b) TEM images of intermediates prepared for 2 h at 25°C. The synthetic system is the methanolic solution of  $\text{Co}^{2+}$  (0.04 M) and Hmim (0.04 M).

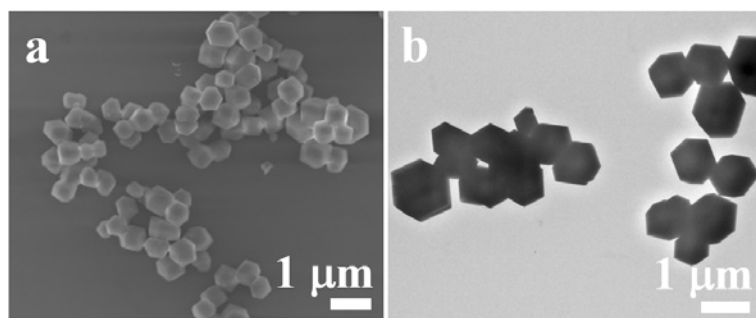

**Figure S20.** Panoramic SEM (a) and TEM (b) images of CoZn-LDHs.

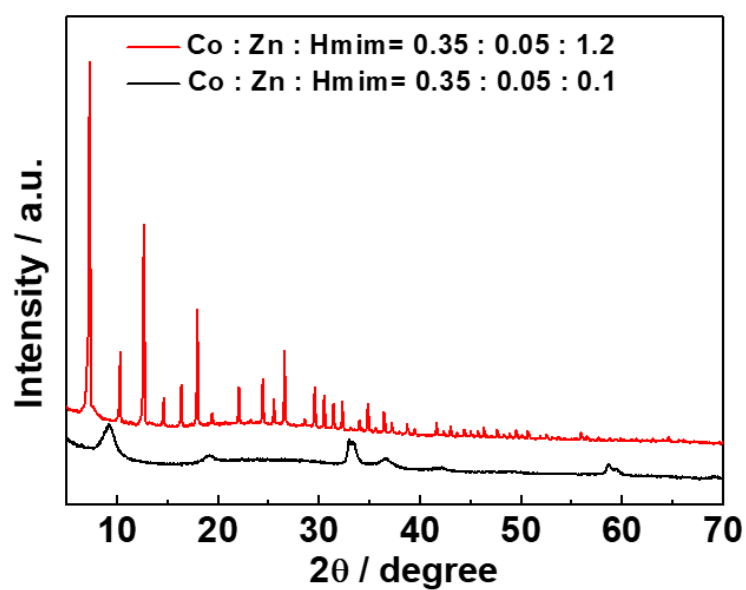

**Figure S21.** XRD patterns of samples prepared at different ratio of 1:3 and 4:1 from metal ions ( $\text{Co}^{2+}$  and  $\text{Zn}^{2+}$ ) to Hmim with metal ion concentration of 0.4 M.

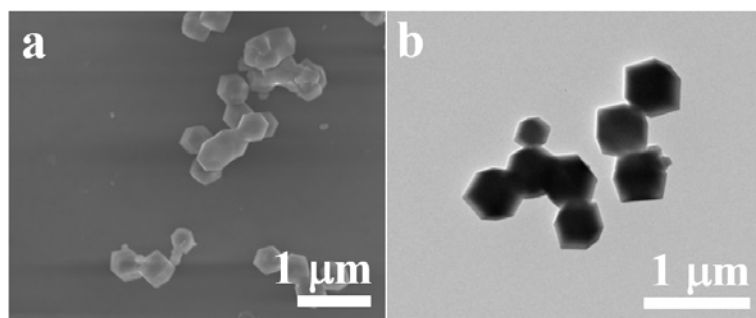

**Figure S22.** Panoramic SEM (a) and TEM (b) images of CoNi-LDHs.

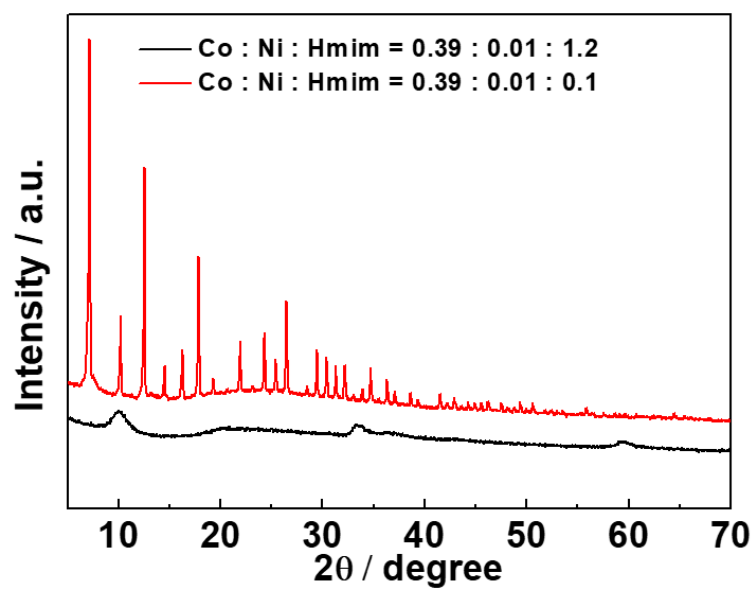

**Figure S23.** XRD patterns of samples prepared at different ratio of 1:3 and 4:1 from metal ions ( $\text{Co}^{2+}$  and  $\text{Ni}^{2+}$ ) to Hmim with metal ion concentration of 0.4 M.

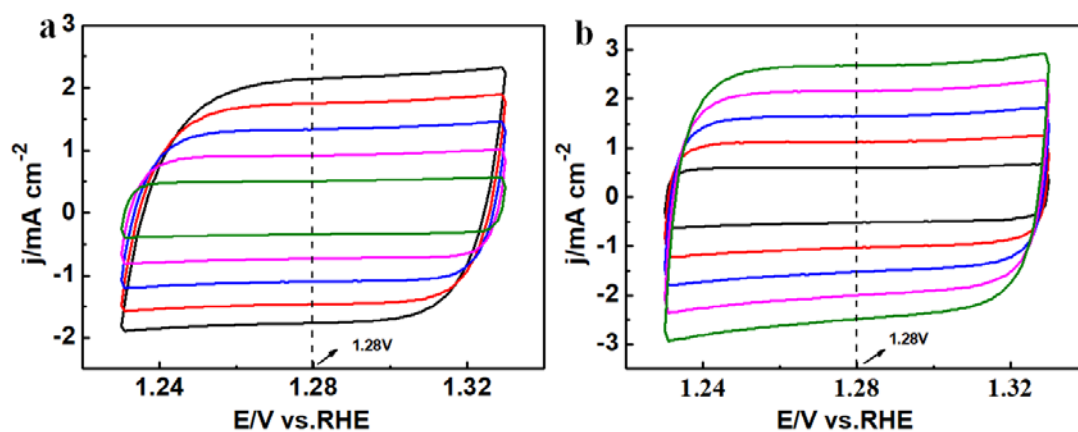

**Figure S24.** CV curves of (a) Co-LDHs-(0.6:1.2) and (b) CoNi-LDHs with a potential window between 1.23 and 1.33 V vs. RHE at different scan rates of 10, 20, 30, 40 and 50  $\text{mV s}^{-1}$ .
